# Supplementary material for: Bamboo leaf-based carbon dots for efficient tumor imaging and therapy
Source: Royal Society of Chemistry journal article supplement (doi:10.1039/c8ra07944g), 2018-01-01
Supplement: c8ra07944g1.pdf [file c8ra07944g1.pdf]

## Supporting Information

### Bamboo Leaves Based Carbon Dots as an Efficient Tumor Imaging and Therapy

Mochamad Zakki Fahmi,<sup>a\*</sup> Abdul Haris,<sup>a</sup> Ahmadi Jaya Permana,<sup>a</sup> Denika Liyan Nor Wibowo,<sup>a</sup> Bambang Purwanto,<sup>b</sup> Yatim Lailun Nikmah,<sup>c</sup> Adi Idris.<sup>d</sup>

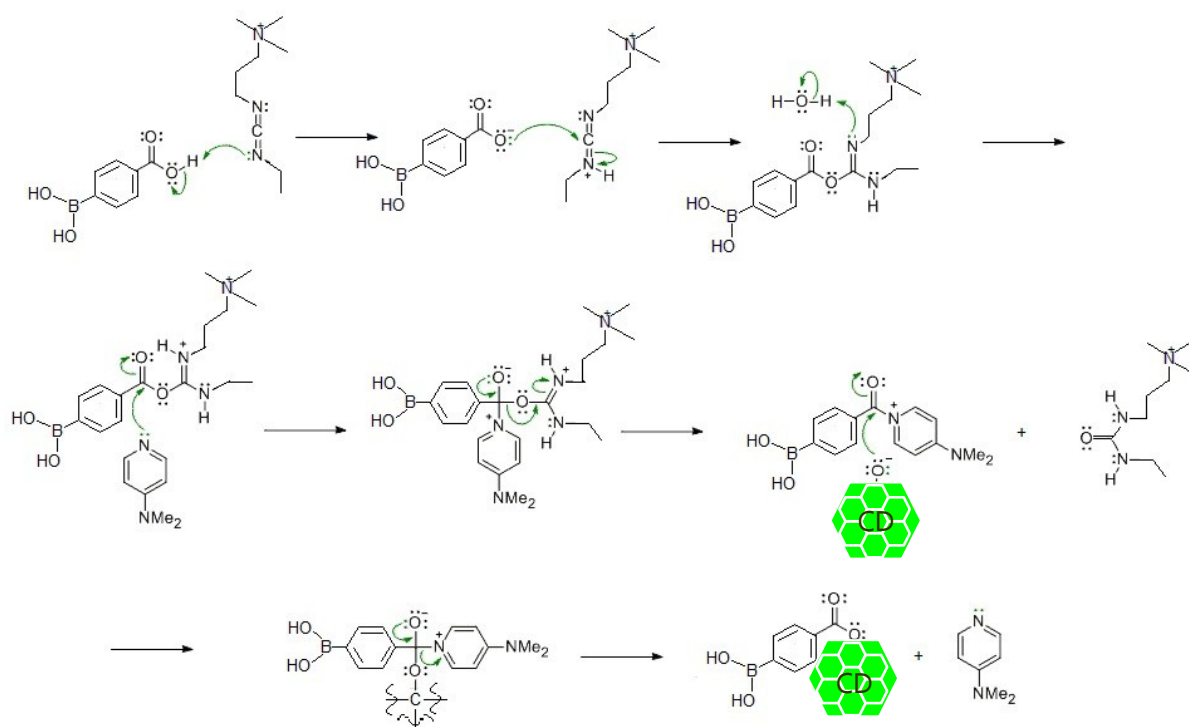

**Figure S1.** Reaction mechanism of conjugating CBBA onto CD through Stenglich Reaction.

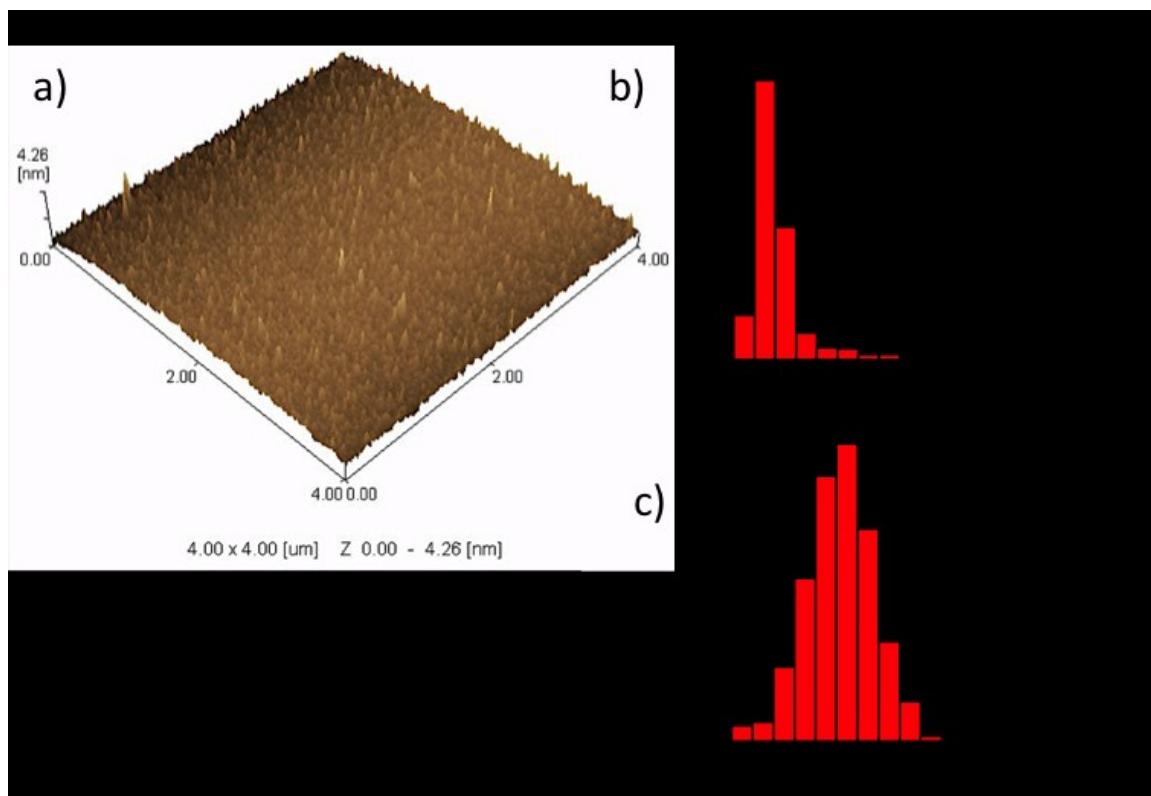

**Figure S2.** (a) AFM Image of CBBA-CD. Size histograms of CD (b) and CBBA-CD (c)

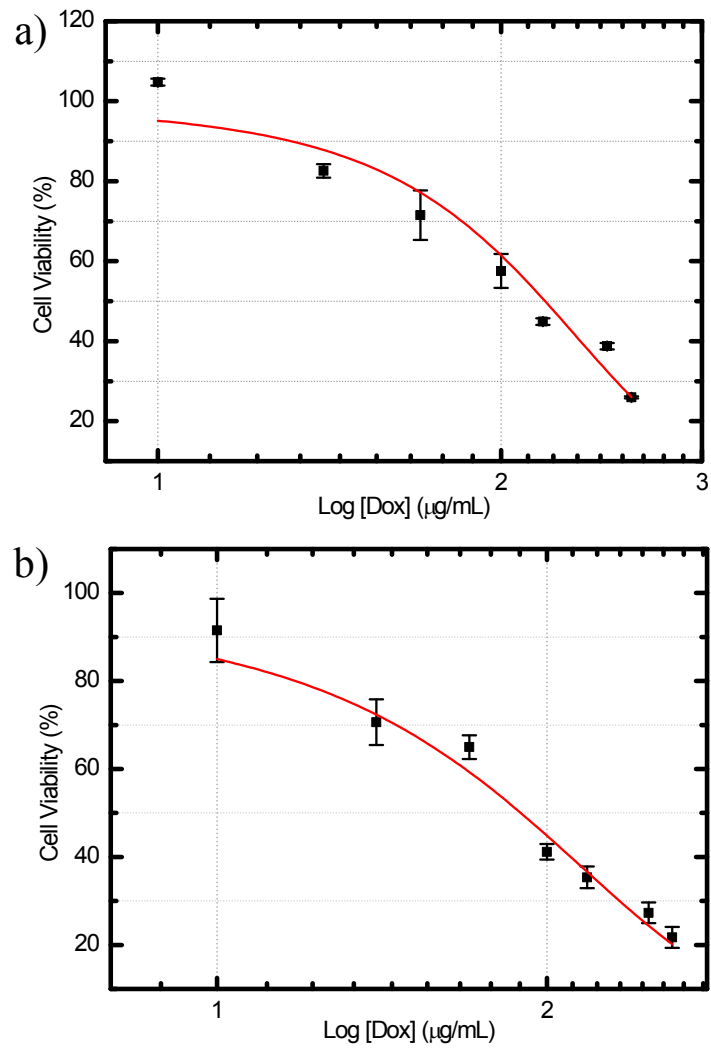

**Figure S2.** The dose–response graphs of HeLa cell after incubated with free Dox (a) and DCCM (b) after 24 h incubation with. IC<sub>50</sub> values can be determined on red fitted curve.
